1 **TITLE:**

2 Decoding the olfactory map: targeted transcriptomics link olfactory sensory neurons to  
3 glomeruli

4  
5 **AUTHORS:**

6 Kevin W. Zhu<sup>1</sup>, Shawn D. Burton<sup>2,3</sup>, Maira H. Nagai<sup>1</sup>, Justin D. Silverman<sup>4,5,6,7</sup>, Claire A. de  
7 March<sup>1</sup>, Matt Wachowiak<sup>3,\*</sup>, Hiroaki Matsunami<sup>1,8,9,\*</sup>

8  
9 **AFFILIATIONS:**

10 <sup>1</sup>Department of Molecular Genetics and Microbiology, Duke University Medical Center;  
11 Durham, North Carolina, 27710, USA

12 <sup>2</sup>Department of Biological Sciences, Lehigh University; Bethlehem, Pennsylvania, 18015,  
13 USA

14 <sup>3</sup>Department of Neurobiology, University of Utah School of Medicine; Salt Lake City, Utah,  
15 84112, USA

16 <sup>4</sup>College of Information Science and Technology, Pennsylvania State University; University  
17 Park, Pennsylvania, 16802, USA

18 <sup>5</sup>Department of Statistics, Pennsylvania State University; University Park, Pennsylvania,  
19 16802, USA

20 <sup>6</sup>Department of Medicine, Pennsylvania State University; Hershey, Pennsylvania, 17033, USA

21 <sup>7</sup>Institute for Computational and Data Science, Pennsylvania State University; University  
22 Park, 16802, USA

23 <sup>8</sup>Department of Neurobiology, Duke University Medical Center; Durham, North Carolina,  
24 27710, USA

25 <sup>9</sup>Duke Institute for Brain Sciences, Duke University; Durham, North Carolina, 27710, USA

26 \*Corresponding authors. Email: [hiroaki.matsunami@duke.edu](mailto:hiroaki.matsunami@duke.edu), [matt.wachowiak@utah.edu](mailto:matt.wachowiak@utah.edu)

27

28 **ONE SENTENCE SUMMARY:**

29 Targeted enrichment of olfactory receptor mRNA in olfactory bulb sections determines spatial  
30 positions for murine glomeruli.

31

32 **ABSTRACT:**

33 Sensory processing in vertebrate olfactory systems is organized across olfactory bulb  
34 glomeruli, wherein axons of peripheral sensory neurons expressing the same olfactory  
35 receptor co-terminate to transmit receptor-specific activity to central neurons. Understanding  
36 how receptors map to glomeruli is therefore critical to understanding olfaction. High-  
37 throughput spatial transcriptomics is a rapidly advancing field, but low-abundance olfactory  
38 receptor expression within glomeruli has previously precluded high-throughput mapping of  
39 receptors to glomeruli. Here we combined spatial sectioning along the anteroposterior,  
40 dorsoventral, and mediolateral axes with target capture enrichment sequencing to overcome  
41 low-abundance target expression. This strategy allowed us to spatially map 86% of olfactory  
42 receptors across the olfactory bulb and uncover a relationship between OR sequence and  
43 glomerular position.

44

45 **MAIN TEXT:**

46 The organization of axonal projections from olfactory sensory neurons (OSNs) in the  
47 olfactory epithelium (OE) to glomeruli on the olfactory bulb (OB) forms the mammalian  
48 olfactory map (1–4). In the mouse, each canonical OSN expresses a single olfactory receptor  
49 (OR) or trace amine-associated receptor (TAAR) allele from a repertoire of over 1000 OR and  
50 TAAR genes. Insights into the organization of the olfactory map were first obtained using in

51 situ hybridization, where OR transcript probes indicated the convergence of OSN axons into  
52 discrete structures called glomeruli on the OB surface, which range from 50 to 120  $\mu\text{m}$  in  
53 diameter (3, 5, 6). Later, this organization was more clearly visualized through the use of  
54 gene-targeted mouse lines, which demonstrated that glomeruli are formed from the axonal  
55 convergence of OSNs expressing the same OR gene (7). Together these studies established  
56 the convergence of homotypic OSN axons to stereotyped glomeruli whose positional  
57 variability ranges from 75 to 270  $\mu\text{m}$  depending on OR identity (5, 8). Because each  
58 glomerulus represents a single OR and a single odorant can bind multiple ORs, odor signals  
59 detected in the OE are transformed into a map of glomerular activity on the OB (9–13).

60 To date, glomerular positions for only ~3% of mouse ORs are available, and further  
61 progress has been stymied due to the low-throughput, laborious, and time-consuming aspects  
62 of currently available methodologies for mapping each OR in the expansive murine repertoire  
63 (7, 8, 13–29). Furthermore, the ability to compare locations between multiple glomeruli is  
64 limited among these studies due to the lack of reference landmarks on the OB and  
65 differences between methodologies. A more efficient approach for mapping OR axon  
66 projections to OB glomeruli would serve to generate a more comprehensive and informative  
67 map that would serve as a foundation for further functional studies of odor coding and  
68 processing. In this study, we demonstrate that target capture enrichment on spatial samples  
69 from the OB enables detection of low-abundance OR and TAAR mRNA in the axon termini of  
70 OSNs. Using this approach, we map 86% of the 1118 ORs and TAARs along the  
71 anteroposterior, mediolateral, and dorsoventral axes and combine these data to generate a  
72 three-dimensional model of glomerular positions with a precision of 141  $\mu\text{m}$ . We examine the  
73 relationship between OR sequence and OB position, identify the set of ORs and TAARs  
74 expressed within dorsal glomeruli accessible to functional imaging, and generate gene-

75 targeted mouse lines for two dorsal glomerular ORs amenable to functional characterization  
76 in vivo.

77

## 78 **RESULTS**

### 79 ***Targeted capture consistently enriches OR transcripts***

80 Previous studies have detected low levels of OR mRNA in OSN axon terminals,  
81 identifying the glomerular positions for specific ORs within histological sections (5, 23, 27). To  
82 quantify OR and TAAR transcripts in the OB we first performed conventional RNA-Seq on  
83 whole-OB tissue from a mouse at postnatal day 21, an age when olfactory glomeruli are fully  
84 developed and finalized in their stereotyped positions (30, 31). Quantification of 25.7 million  
85 reads identified 410/1118 (36.7%) intact ORs at an average abundance of 0.06 transcripts per  
86 million (TPM) (median OR TPM = 0, 6/15 (40%) TAARs with TPM above 0, mean TAAR TPM  
87 = 0.077, median TAAR TPM = 0) (Fig. 1, B and C), confirming the low abundance of OR  
88 mRNA in OSN axon terminals.

89 To enrich sampling for OR transcripts, we designed a target capture array against  
90 chemosensory receptor gene families primarily targeting ORs and TAARs (32). We applied  
91 this target capture array to the previously sequenced OB library and identified 842 of the 1118  
92 ORs (75.3%) and 10 of the 15 TAARs (66.7%) (Fig. 1, A to C). Following targeted capture,  
93 these ORs were present in a set of 27.7 million reads at an average abundance of 360.27  
94 TPM (median = 106.74 TPM, mean TAAR TPM = 871.66, median TAAR TPM = 64.62)  
95 resulting in a mean fold enrichment of 6005X (mean TAAR fold enrichment = 11320X) (Fig. 1,  
96 B and C). Spearman's rho for OR and TAAR transcript abundances between uncaptured and  
97 captured samples was 0.71 ( $P < 2.2 \times 10^{-16}$ ). Further, four sets of independently captured  
98 technical replicates from two different OBs (two distinct spike-in mRNAs for RNA subsamples  
99 from each of the two bulbs, and two technical replicates per subsample) exhibited a

100 Spearman's rho of 0.95 ( $P < 2.2 \times 10^{-16}$ ) (Fig. 1D and fig. S1D). The fold enrichment and  
101 correlation between pre- and post-capture samples indicates the targeted capture approach  
102 enriches the majority of ORs and TAARs in a highly consistent fashion as evidenced by the  
103 technical replicate correlation. The mean pairwise Spearman's rho for three biological  
104 replicate OBs was 0.83 ( $P < 2.2 \times 10^{-16}$ ), indicating the relative abundance of OR and TAAR  
105 transcripts is conserved between individual animals (Fig. 1E and fig. S1E).

106 In summary, targeted capture consistently enriched OR and TAAR transcripts to levels  
107 that facilitate positional analysis. This encouraged us to conduct targeted capture of ORs and  
108 TAARs from sections of OB to determine which ORs were expressed in each section. We  
109 sectioned from three directions, dorsoventral (DV), anteroposterior (AP), and mediolateral  
110 (ML). We note that these three axes are not precisely orthogonal and not perfectly  
111 concordant with the corresponding reference features such as DV zonal boundaries and  
112 medial surface of the OB.

113

114 ***Expression of ORs and TAARs in dorsoventral OB sections correlates with OE***  
115 ***expression zones***

116 Pioneering investigation established that ORs are expressed in overlapping,  
117 continuous zones of the OE along the DV axis (33, 34). This zonal OE organization further  
118 correlates with DV glomerular positions of OR expression in the OB (7, 23, 35), with more  
119 recent studies leveraging multiplexed assays and transcriptomics to map an expanded  
120 number of ORs to more specific OE zones (36, 37). To comprehensively assess the  
121 relationship of OE-OB DV zonal organization of OR expression, we collected 100  $\mu\text{m}$   
122 sequential sections along the OB DV axis for targeted transcriptomics to determine which  
123 ORs were expressed in each section. Canonically, each OR is expressed in two glomeruli per  
124 bulb, both of which are expected to be located in similar positions along the DV axis. If

125 enriched OR sequences are from OSN axon terminals, we expect that each OR would be  
126 abundant in spatially clustered sections which reflect the OE DV position from which the  
127 axons originate.

128 After weighting and normalization across individual mice, the localization pattern of  
129 each OR and TAAR was limited to a single spatial cluster in a series of neighboring sections  
130 for a majority of the capture-enriched transcripts (Fig. 2, A, B, and C). Uniform Manifold  
131 Approximation and Projection (UMAP) (38) visualization of data from the three DV replicate  
132 mice (22 sections per replicate) placed sequential sections from replicate animals in an  
133 ordered, non-clustered path, indicating that spatially related sections have similar  
134 transcriptional profiles (Fig. 2D). Replicate heatmaps were similar to each other (mean  $RV_{adj} =$   
135  $0.1803$ ), which supports the stereotyped targeting of glomeruli to local domains (39, 40). To  
136 assess concordance of OB and OE positions along the DV axis, we constructed an  
137 expression-weighted mean DV position for each OR from the average of all three DV replicate  
138 mice, which we found correlated with the published OE DV positions of each OR (Spearman's  
139 rho of mean position and OE index =  $0.775$ ,  $P < 2.2 \times 10^{-16}$ , Spearman's rho =  $-0.690$ ,  $P < 2.2$   
140  $\times 10^{-16}$ ) (Fig. 2E and fig. S2A) (36, 37). Along the DV axis, we found dorsal OE ORs, Class I  
141 ORs, and TAARs primarily located in the dorsal OB sections, while Class II ORs were  
142 distributed evenly along the DV axis, in agreement with previous mapping studies (dorsal vs  
143 ventral  $P = 4.292 \times 10^{-95}$ , Class I vs Class II  $P = 5.912 \times 10^{-20}$ , TAAR vs OR  $P = 0.0001$ ,  
144 Mann-Whitney U-test) (Fig. 2F) (29).

145

146 ***Anteroposterior spatial sections reflect stereotyped targeting of mirror-symmetric***  
147 ***glomeruli***

148 Using the same approach as for the DV axis, we examined 100- $\mu$ m sections along the  
149 AP axis of the OB to further assess the precision and reproducibility of our method and the

150 stereotypical patterning of OR glomeruli. Prior studies have shown that each OR typically has  
151 two glomeruli located in distinct, yet spatially linked AP and mediolateral (ML) positions, as  
152 each OB is organized into half bulbs along a non-orthogonal symmetry line (8, 41, 42). This  
153 symmetry typically leads to more posterior positioning of the medial glomerulus for an OR.  
154 However, in cases where the target location of an OR is close to the symmetry line, both  
155 glomeruli may appear in the same AP plane or only a single glomerulus may form (43). Based  
156 on these studies, we hypothesized that a majority of ORs would exhibit a bimodal expression  
157 pattern along the AP axis.

158 Spatial expression patterns of the normalized transcript abundances for 967 ORs and 14  
159 TAARs were consistent across replicates, with stereotyped AP glomerular positions across  
160 OBs (8, 44). When sorted by position of mean expression, ORs primarily displayed two peaks  
161 of expression, consistent with published studies for labeled ORs displaying the medial  
162 glomerulus in a more posterior location relative to the lateral glomerulus (Fig. 3, A and B, and  
163 fig. S3A) (8). Compared to the distribution of normalized OR expression across the DV axis,  
164 ORs along the AP axis were distributed bimodally (Fig. 3C). Similar to the DV axis, UMAP  
165 projections of gene expression values from the six AP replicate mice (23 sections per  
166 replicate) revealed correlated expression patterns and AP positions across each OB (Fig. 3D).  
167 Across the AP axis, we found Class I ORs biased to the anterior set of sections, while TAARs  
168 tended to be localized to the central portion of the axis (Class I vs Class II  $P = 2.017 \times 10^{-26}$ ,  
169 TAAR vs OR  $P = 0.7882$ , Mann-Whitney U-test) (Fig. 3E), consistent with previous studies  
170 examining glomeruli labeled in gene-targeted mice (29, 45). We also examined our data for  
171 concordance against the set of 32 ORs cloned from the anterior, middle, and posterior  
172 sections of an OB from Nakashima et al. (46). The ORs cloned from the anterior and middle  
173 OB ( $n = 13$ ) had significantly more anterior mean positions than ORs cloned from the  
174 posterior OB ( $n = 18$ ) (anterior + middle OB cloned ORs vs posterior OB cloned ORs  $P =$

175 0.001, Mann-Whitney U-test) (Fig. 3F and fig. S4A). We further divided these cloned ORs  
176 across dorsal OE (n = 11) and ventral OE (n = 20) zones and found that both sets displayed  
177 concordance with our AP data, with ORs cloned from the anterior and middle OB positions  
178 having a lower AP mean position than ORs cloned from the posterior OB (dorsal OE: anterior  
179 and middle OB cloned ORs vs posterior OB cloned ORs  $P = 0.1636$ , ventral OE: anterior and  
180 middle OB cloned ORs vs posterior OB cloned ORs  $P = 0.0117$ , Mann-Whitney U-test) (fig.  
181 S4, B and C).

182

### 183 ***Relationship of OR sequence and OB position***

184 Gene-targeting approaches have identified a handful of examples in which OR  
185 sequence similarity correlates with glomerular position proximity (24, 47). Our dataset with a  
186 majority of ORs assigned to specific AP positions allowed us to systematically interrogate  
187 whether ORs with similar sequences exhibit similar glomerular positions by computing  
188 pairwise alignments for all ORs. To assess this relationship in all dimensions, we additionally  
189 generated a ML dataset (3 replicates, 22 sections per replicate) (fig. S5, A to E). Due to the  
190 combined presence of Class I ORs, Class II ORs, and TAARs on the dorsal surface of the  
191 OB, we separated our analysis into three groups: 1) Class I dorsal OB ORs, 2) Class II dorsal  
192 OB ORs, and 3) Class II ventral OB ORs. To assess OR similarity, we defined an OR gene  
193 alignment score threshold of 567, which corresponds approximately to the 40% identity  
194 threshold used to classify OR genes as belonging to a family (fig. S6A) (48). When comparing  
195 OR pairs above ( $\geq 567$ ) and below ( $< 567$ ) the family-level threshold, we found both Class II  
196 dorsal and ventral ORs below the family level threshold displayed significant lower mean  
197 interglomerular distances across the AP, DV, and ML axes, suggesting topological relationship  
198 between the glomerular positions and family-level OR similarities for Class II ORs (Fig. 4A). In  
199 contrast, Class I ORs did not display a consistent relationship between sequence similarity



200 and mean expression position along the DV and ML axes (median AP distance: 1.42 for  $\geq 567$   
201 and 2.18 for  $< 567$   $P < 2.2e-16$ , median DV distance: 2.59 for  $\geq 567$  and 2.44 for  $< 567$   $P =$   
202 0.004, median ML distance: 2.95 for  $\geq 567$  and 2.67 for  $< 567$   $P = 1.53e^{-5}$ , Mann-Whitney U-  
203 test) (fig. S6B).

204 We further examined this relationship by comparing ORs above the 40% (family level  
205 ORs), 60% (subfamily level ORs) and 80% (highly similar, used to define OR orthologs)  
206 protein identity thresholds (48, 49) using the pairwise alignment score thresholds 993 and  
207 1337 respectively. Comparisons between family (567-993), subfamily (993-1337), and highly  
208 similar ORs ( $> 1337$ ) revealed similar results among the Class II ORs (Fig. 4B). Along the AP  
209 axis, both dorsal and ventral Class II ORs displayed progressively more similar glomerular  
210 positions in groups with higher sequence similarity with statistical significance except for one  
211 comparison (Fig. 4B and Table S5). Results for both dorsal and ventral Class II ORs along the  
212 DV and ML axes and for Class I ORs along all axes indicated that among the groups of  
213 related ORs, glomerular positions typically become more similar or do not change with  
214 increasing sequence similarity. Altogether our data generally agrees with a model in which  
215 overall similarities of ORs influence the relative glomerular locations.

216 We next sought to determine if any specific OR amino acid residues correlated with AP  
217 position. Due to the different relationships between sequence similarity and OB position for  
218 dorsal and ventral ORs, we examined Class II ORs using different cutoffs for the sets of the  
219 most anterior and most posterior ORs included in the analysis (20%, 27.5%, 35%) to identify  
220 amino acid residues correlating with AP position (Fig. 4C and fig. S7A, B, C). We identified 22  
221 residues whose physicochemical properties differed from all ventral Class II ORs (Fig. 4D and  
222 fig. S8C and S9) (50). Notably, four consecutive residues that correlated with AP position  
223 were in the third intracellular loop, which has been shown to interact directly with the G  
224 protein during Class A GPCR activation (Fig. 4, D to F, and fig S8, A and B) (51). Additionally,

225 the phenylalanine within the KAFSTC<sub>x</sub>SH motif is sandwiched between four residues involved  
226 in G-protein binding, (52–54). These findings indicate residues that are at or near the sites of  
227 G-protein interactions are critical in determining glomerular position, which is consistent with  
228 the hypothesis that ligand-independent basal activity of ORs influences glomerular targeting  
229 (43, 46, 55–57).

230

### 231 ***A three-dimensional model of OR glomerular positions reflects established features***

232 To systematically estimate OR glomerular positions across the entire OB, we merged  
233 our AP, DV, and ML datasets into a unified 3D model. UMAP plots of the mean position of  
234 ORs in each dimensional replicate indicated that ORs fall along a 3D axis oriented from  
235 anterior-dorsal-medial to posterior-ventral-lateral (fig. S10, A and B). To account for the  
236 location of OR glomeruli on the outer surface of the OB, we extracted coordinates from a  
237 diffusion tensor imaging (DTI) model of the mouse OB to represent the approximate  
238 glomerular layer that would have been sampled by each section along each dimension of our  
239 targeted transcriptomics data (58). We applied a Bayesian model that computes probability  
240 distributions for each OR in each voxel based on the isometric-log ratio transform of the  
241 normalized read counts from the corresponding set of intersecting AP, DV, and ML single-  
242 dimension samples (59, 60). These normalized counts were weighted by the proportion of  
243 TPM of total olfactory marker protein (OMP; expressed in all mature OSNs) originating from  
244 that position, normalized by the proportion of voxels located in that section. Finally, we  
245 developed an algorithm for the systematic reduction of positional probabilities across the  
246 whole OB surface into predicted OR glomerular positions which were then filtered to remove  
247 predictions with posterior median values below 0.0005 to account for ORs with low  
248 expression. Posterior median summaries for the resulting set of 709 ORs and TAARs in all  
249 voxels are freely viewable as interactive 3D maps at [kanazian.shinyapps.io/obmap/](http://kanazian.shinyapps.io/obmap/).

250 We assessed our algorithm by comparing predictions for Class I and II ORs, dorsal and  
251 ventral OE ORs, and the set of ORs examined via transgenic mouse lines by Zapiec et al. (8).  
252 Predicted glomerular positions for Class I ORs, Class II ORs, and dorsal and ventral ORs  
253 were consistent with expectations based on OE zone, OR class, and our single-dimension  
254 data (dorsal vs ventral  $P = 8.26 \times 10^{-99}$ , Class I vs Class II  $P = 1.962 \times 10^{-12}$ , functional  
255 imaging surface enriched vs not-enriched  $P = 1.38 \times 10^{-18}$  (see below), Mann-Whitney U-test)  
256 (Fig. 5, A and E and fig. S11, C, and D). Additionally, the distribution of predictions for the sets  
257 of Class I ORs and TAARs matched previously published findings for target domains (Fig. 5B  
258 and fig. 11). Our current model predicts glomerular positions for 700 ORs and 9 TAARs, with  
259 predicted positions outperforming randomly selected ORs from the same DV zone and  
260 medial/lateral side for the subset of ORs with known positions with a median error of 141  $\mu\text{m}$   
261 (Fig. 5, C and D) (8). The relative positions of the Olfr1377 and Olfr881 glomeruli in the gene-  
262 targeted mouse lines (see below) were also consistent with those predicted from the spatial  
263 transcriptomic data (Fig. 5C and figs. S13 and S14 fig. S12D), providing further support for  
264 our three-dimensional glomerular predictions based on the spatial transcriptomic data. In  
265 summary, we found our three-dimensional reconstruction of OR glomerular positions to be  
266 both in agreement with established OR spatial features and to show greater concordance with  
267 these established features than the sets of single-dimension target capture sequencing data  
268 alone. Collectively, our results thus provide the first large-scale, unified, and systematic  
269 database of OR glomerular positions for the mouse OB.

270

### 271 ***Identification of ORs within the dorsal functional imaging window***

272 We sought to validate and extend our findings by examining specific ORs that map to  
273 glomeruli on the dorsal-central OB surface, which has been extensively characterized by  
274 functional imaging in vivo (9, 11, 12, 44, 61). To define the set of ORs accessible under

275 standard functional imaging approaches, we collected tissue samples from OBs from C57BL6  
276 mice (2 male, 2 female). Each OB was dissected into two parts, one containing the  
277 approximate dorsal-central imaging area and the other containing the remainder of the OB  
278 (fig. S12A). These 16 samples were processed for target capture sequencing and differential  
279 expression analysis to identify ORs enriched in the functional imaging area.

280 A total of 121 ORs, including 27 Class I ORs and 94 Class II ORs, were consistently  
281 enriched in the imaging surface ( $FDR \leq 0.05$  and  $\text{LogFC} > 0$ ) (Fig. 5B, Fig. S12, B, E and F),  
282 with 96% of these ORs known to localize in dorsal OE zones (36). We also found nine of the  
283 15 TAARs enriched in the imaging surface, with no TAARs enriched in the remaining OB  
284 tissue (fig. S12G), consistent with previous functional imaging of some TAAR glomeruli (45).  
285 To anatomically and functionally validate our expression analysis, we chose two ORs as  
286 targets for the generation of receptor-tagged gene-targeting mouse lines, based on their  
287 enrichment in the functional imaging area (Olf881:  $FDR = 0.007$ ,  $\text{LogFC} = 2.55$  and Olf1377:  
288  $FDR = 0.021$ ,  $\text{LogFC} = 2.14$ ) (fig. S12B) and their robust response to the odorant 4-  
289 methylacetophenone in pS6-IP RNA-Seq experiments (Olf1377:  $FDR = 3.43e^{-26}$ ,  $\text{LogFC} =$   
290  $3.18$ , Olf881:  $FDR = 7.37e^{-23}$ ,  $\text{LogFC} = 3.18$ ). (fig. S12C) (62). Using *Easi-CRISPR* (63), we  
291 inserted *IRES-mKate2* cassettes following the CDS of each OR to create Olf1377-IRES-  
292 mKate2 and Olf881-IRES-mKate2 mice, in which OSNs expressing either Olf1377 or  
293 Olf881 also express the cytosolic fluorescent marker mKate2, labeling cell bodies in the OE  
294 and glomeruli in the OB (fig. S12D). Whole-mount confocal imaging of the OB in gene-  
295 targeted mice revealed mKate2-labeled glomeruli within the dorsal-central OB surface (Fig.  
296 6A and fig. S13, A and B).

297 Examination of additional whole-mount epifluorescence images allowed us to further  
298 assess position and variance of both Olf1377 and Olf881 (fig. S14, Fig. 5C). Consistent with  
299 the singular expression of most ORs as two mirror-symmetric glomeruli, both gene-targeted

300 mouse lines labeled two glomeruli per OB. The lateral Olfr1377 glomerulus (n = 10) was  
301 positioned centrally along on the AP axis and central-laterally within the ML axis imaging area,  
302 while the medial glomerulus (n = 6) was more posterior, ventral, and medial. The lateral  
303 Olfr881 glomerulus (n = 9) was positioned centrally along the ML axis and relatively posterior  
304 within the imaging area, while the medial glomerulus (n = 8) displayed a more variable  
305 position across the medioposterior quarter of the dorsal surface. The lateral Olfr1377  
306 glomerulus displayed nearly twice (196.8%) the positional variance than the lateral Olfr881  
307 glomerulus while the medial Olfr1377 glomerulus was distributed in an area nearly half the  
308 size (52.8%) of its Olfr881 counterpart.

309

### 310 ***Functional imaging of dorsal ORs***

311 Expression of long-wavelength mKate2 as an OR-specific marker allowed for functional  
312 characterization of Olfr1377 and Olfr881 glomeruli by crossing the generated mouse lines to  
313 OSN-specific driver lines expressing a GCaMP Ca<sup>2+</sup> reporter. For maximal imaging  
314 sensitivity, we crossed each mKate2 line to the OMP-IRES-tTA driver line (64) and the tetO-  
315 GCaMP6s reporter line (65). In the resulting triple crosses, we readily located the lateral  
316 mKate2-tagged glomeruli on the dorsal functional imaging surface (Fig. 6A) and imaged  
317 odorant-evoked GCaMP6s signals from these and neighboring glomeruli using dual-  
318 wavelength two-photon imaging in anesthetized mice. Consistent with our pS6-IP in vivo data  
319 (fig. S12C), both Olfr1377 and Olfr881 exhibited robust responses to low concentrations of 4-  
320 methylacetophenone, with Olfr1377 exhibiting a stronger response than Olfr881 (Fig. 6, B and  
321 C). In addition to 4-methylacetophenone, we also tested a large odorant panel including  
322 multiple cyclic ketones structurally related to 4-methylacetophenone, as well as more diverse  
323 odorants, all at relatively low concentrations. From this panel, we identified multiple new, high-  
324 affinity ligands for each OR, including many cyclic ketones, and ultimately uncovered

325 overlapping but distinct response spectra for Olfr1377 and Olfr881 (Fig. 6C, fig. S15C). For  
326 example, Olfr1377 showed strong responses to p-anisaldehyde, acetophenone, and the  
327 aliphatic ketone 4-methyl-3-penten-2-one, while Olfr881 proved unresponsive to these  
328 odorants.

329 Interestingly, Olfr1377 (but not Olfr881) exhibited an exceptionally strong response to 4-  
330 methoxyacetophenone, with a brief (2 s) presentation of ~0.4 nM 4-methoxyacetophenone  
331 eliciting long-term activation and desensitization (fig. S15, A and B). Additional concentration  
332 screening suggested an in vivo response threshold of  $\sim 10^{-13}$  M 4-methoxyacetophenone for  
333 the Olfr1377 glomerulus (Fig. 6D and fig. S15D). To complement our in vivo imaging and  
334 pS6-IP RNA-Seq analyses and further evaluate the sensitivity of Olfr1377 to 4-  
335 methylacetophenone and 4-methoxyacetophenone, we additionally expressed Olfr1377 in  
336 Hana3a cells and examined luciferase responses to different concentrations of 4-  
337 methoxyacetophenone, 4-methylacetophenone, 2'-hydroxyacetophenone, and acetophenone  
338 (66, 67). Reinforcing our in vivo results, Olfr1377 responded to all four odorants (Fig. 6E).  
339 Moreover, Olfr1377 responded to 4-methoxyacetophenone at just 1 nM and saturated at 100  
340 nM in vitro, a response orders-of-magnitude more sensitive than the response to any other  
341 odorant tested. Collectively, these findings thus identify 4-methoxyacetophenone-Olfr1377 as  
342 a ligand-receptor interaction with exceptionally high affinity.

343

## 344 **DISCUSSION**

345 Olfactory receptor neurons in *Drosophila* predominantly express a single OR out of a  
346 repertoire of 62 OR genes and project their axons to one of ~50 distinct glomeruli on each  
347 antennal lobe (68, 69). These glomeruli have been individually linked to specific ORs,  
348 allowing for a complete picture of how sensory information is organized within the first  
349 olfactory relay (69–71). This key map has served as a foundation for critical studies regarding

350 sensory processing, olfactory receptor neuron-targeting factors, the propagation of  
351 information to higher-order neurons, and the cellular composition of the antennal lobe (72–  
352 75). In contrast, the mammalian system involves over an order of magnitude more receptors  
353 and lacks such a comprehensive and specific mapping.

354         With over 1000 ORs projecting to approximately 1800 glomeruli arrayed over the three-  
355 dimensional surface of the mouse OB, the experimental challenge of mapping ORs to  
356 glomeruli is profound (76). To date, such mapping in the mouse has relied primarily on the  
357 creation of gene-targeted animals or in situ hybridization of radiolabeled probes. Further, the  
358 lack of finescale landmarks within the OB and differences between methods used to identify  
359 glomerular positions has led to relatively limited comparable positional information, with single  
360 studies examining just six ORs by in situ hybridization and five by fluorescent markers (8, 26).  
361 Given the low-throughput of these previous assays and the large size of the mouse OR  
362 repertoire, the ability of the field to comprehensively assess the genetic and logical  
363 organization of the olfactory map has been limited.

364         Here, we demonstrate a unique application of target capture sequencing, enriching  
365 low-abundance target transcripts found in the axon terminals of sensory neurons and  
366 comparing post-enrichment abundances between samples. We applied this method to 100  
367  $\mu\text{m}$  sections along the three cardinal axes to circumvent a longstanding problem in olfaction:  
368 resolving the receptor organization of the olfactory map. Our high-throughput approach  
369 generated the first repertoire-scale dataset for OR glomerular positions and enabled the  
370 creation of a three-dimensional positional estimate for the glomeruli of a majority of the OR  
371 repertoire with an approximate precision within ranges previously observed for positional  
372 variability between animals. The scale of our study enabled us to verify the longstanding  
373 observation that OE zones map directly to OB glomeruli along the dorsoventral axis.  
374 Additionally, our dataset allowed us to begin interrogating how OR sequence is related to OB

375 target position, an important aspect for the formation of the olfactory map. We found that, in  
376 general, OR sequence similarity correlates with OB target position for both classes of ORs  
377 and for both the dorsal and ventral hemispheres of the OB. Targeting along the AP axis has  
378 further been hypothesized to be associated with ligand-independent basal activity of the OR  
379 protein located at the axon terminal membrane. We defined a set of amino acid residues  
380 correlated with the most-anterior and most-posterior ventral Class II ORs. Intriguingly, many  
381 of these residues were proximal to domains involved in G-protein coupling, which raises the  
382 possibility for involvement in modulation of basal activity levels, which would in turn influence  
383 targeting along the AP axis. Mutational studies testing a diverse set of ORs in both in vitro  
384 and in vivo paradigms will likely be needed to determine the exact effect of each residue as  
385 basal activity is dependent on the OR, secondary structure interactions, and the membrane  
386 the receptor is embedded within.

387 While our data lacks single glomerulus-level spatial resolution, our three-dimensional  
388 model provides a probabilistic model of OR glomerular positions that leverages biological  
389 replicates and glomerular position stereotypy. We provide a visualization of the most likely  
390 voxel for a given glomerulus and high probability voxels indicating the potential variance in  
391 position. We provide predictions for all 980 ORs and TAARs analyzed in our single-dimension  
392 heatmaps in an online application where we provide an interactive model with values and  
393 filters for probabilities of our predictions.

394 In developing this three-dimensional model, we also identified the set of ORs and  
395 TAARs present within the dorsal surface that is typically viewed in functional imaging studies,  
396 which, almost exclusively, lack information regarding the OR identity of the observed  
397 glomerular responses. Identification of this set, representing ~10% of the OR repertoire, will  
398 directly facilitate the in vivo deorphanization of ORs by guiding combined gene-targeting and  
399 functional imaging approaches – a strategy crucial for validating and fine-tuning



400 complementary in vitro deorphanization screens (13, 77). Using this approach, we identified  
401 numerous ligands for two previously uncharacterized ORs - Olfr881 and Olfr1377 - including  
402 odorants activating both receptors (e.g., 4-methylacetophenone; methyl isoeugenol) as well  
403 as odorants selectively activating only Olfr881 (e.g., menthone) or Olfr1377 (e.g., p-  
404 anisaldehyde). In addition, we uncovered an exceptionally sensitive and long-lasting response  
405 of Olfr1377 to 4-methoxyacetophenone, with affinity paralleling the ultrasensitive detection of  
406 amines by TAARs (77). Of great interest, this latter result tentatively suggests that high-affinity  
407 odorant-receptor interactions are not exclusively limited to TAARs and physiologically  
408 important amines, but may exist for a broader collection of ORs and diverse odorants.

409         The projection of OSN axons from the OE to OB glomeruli requires exquisite accuracy  
410 and precision. The degree of inter-individual variation requires replicate animals to be  
411 sampled and limits the precision to which any approach can achieve, and our approach  
412 provides a level of precision that is comparable to the resolution limits set by stereotyped  
413 targeting. The mapping of OR glomerular positions to specific subdomains of the OB broadly  
414 serves to generate unique insights into how this early sensory relay center is organized and  
415 reflects our chemical environment. Joining ligand-receptor deorphanization data with our  
416 newly generated OR-OB positional data enables large-scale investigations into how  
417 representations of odor space relate to topographical features in the OB and facilitates the  
418 development of unified, systematic models for how chemical inputs are processed,  
419 interpreted, and transformed into odor-driven behaviors.

420

421 **REFERENCES:**

- 422 1. L. B. Buck, Information coding in the vertebrate olfactory system. *Annu. Rev. Neurosci.*  
423 **19**, 517–544 (1996).
- 424 2. H. Takeuchi, H. Sakano, Neural map formation in the mouse olfactory system. *Cell.*  
425 *Mol. Life Sci.* **71**, 3049–3057 (2014).
- 426 3. S. M. Potter, C. Zheng, D. S. Koos, P. Feinstein, S. E. Fraser, P. Mombaerts, Structure  
427 and emergence of specific olfactory glomeruli in the mouse. *J. Neurosci.* **21**, 9713–9723  
428 (2001).
- 429 4. A. J. Pinching, T. P. Powell, The neuropil of the glomeruli of the olfactory bulb. *J. Cell*  
430 *Sci.* **9**, 347–377 (1971).
- 431 5. K. J. Ressler, S. L. Sullivan, L. B. Buck, Information coding in the olfactory system:  
432 Evidence for a stereotyped and highly organized epitope map in the olfactory bulb. *Cell.*  
433 **79**, 1245–1255 (1994).
- 434 6. R. Vassar, S. K. Chao, R. Sitcheran, J. M. Nuñez, L. B. Vosshall, R. Axel, Topographic  
435 organization of sensory projections to the olfactory bulb. *Cell.* **79**, 981–991 (1994).
- 436 7. P. Mombaerts, F. Wang, C. Dulac, S. K. Chao, A. Nemes, M. Mendelsohn, J.  
437 Edmondson, R. Axel, Visualizing an olfactory sensory map. *Cell.* **87**, 675–686 (1996).
- 438 8. B. Zapiec, P. Mombaerts, Multiplex assessment of the positions of odorant receptor-  
439 specific glomeruli in the mouse olfactory bulb by serial two-photon tomography. *Proc.*  
440 *Natl. Acad. Sci.* **112**, E5873-5882 (2015).
- 441 9. B. D. Rubin, L. C. Katz, Optical imaging of odorant representations in the mammalian  
442 olfactory bulb. *Neuron.* **23**, 499–511 (1999).
- 443 10. R. W. Friedrich, S. I. Korsching, Combinatorial and Chemotopic Odorant Coding in the  
444 Zebrafish Olfactory Bulb Visualized by Optical Imaging. *Neuron.* **18**, 737–752 (1997).
- 445 11. M. Wachowiak, L. B. Cohen, Representation of odorants by receptor neuron input to the

- 446 mouse olfactory bulb. *Neuron*. **32**, 723–735 (2001).
- 447 12. T. Bozza, J. P. McGann, P. Mombaerts, M. Wachowiak, In vivo imaging of neuronal  
448 activity by targeted expression of a genetically encoded probe in the mouse. *Neuron*.  
449 **42**, 9–21 (2004).
- 450 13. Y. Oka, S. Katada, M. Omura, M. Suwa, Y. Yoshihara, K. Touhara, Odorant Receptor  
451 Map in the Mouse Olfactory Bulb: In Vivo Sensitivity and Specificity of Receptor-Defined  
452 Glomeruli. *Neuron*. **52**, 857–869 (2006).
- 453 14. C. Zheng, P. Feinstein, T. Bozza, I. Rodriguez, P. Mombaerts, Peripheral Olfactory  
454 Projections Are Differentially Affected in Mice Deficient in a Cyclic Nucleotide-Gated  
455 Channel Subunit. *Neuron*. **26**, 81–91 (2000).
- 456 15. M. Smear, A. Resulaj, J. Zhang, T. Bozza, D. Rinberg, Multiple perceptible signals from  
457 a single olfactory glomerulus. *Nat. Neurosci.* **16**, 1687–1691 (2013).
- 458 16. J. Strotmann, S. Conzelmann, A. Beck, P. Feinstein, H. Breer, P. Mombaerts, Local  
459 permutations in the glomerular array of the mouse olfactory bulb. *J. Neurosci.* **20**,  
460 6927–6938 (2000).
- 461 17. C. D. Hulst, R. B. Mina, Z. Gershon, M. E. Rogers, Y. Sirotin, P. Feinstein, C. D. Hulst,  
462 R. B. Mina, Z. Gershon, S. Jamet, A. Cerullo, D. Tomoiaga, MouSensor : A Versatile  
463 Genetic Platform to Create Super Sniffer Mice for Studying Human Odor Coding Article  
464 MouSensor : A Versatile Genetic Platform to Create Super Sniffer Mice for Studying  
465 Human Odor Coding. *Cell Rep.* **16**, 1–11 (2016).
- 466 18. T. Bozza, P. Feinstein, C. Zheng, P. Mombaerts, Odorant receptor expression defines  
467 functional units in the mouse olfactory system. *J. Neurosci.* **22**, 3033–3043 (2002).
- 468 19. X. Grosmaître, S. H. Fuss, A. C. Lee, K. a Adipietro, H. Matsunami, P. Mombaerts, M.  
469 Ma, SR1, a mouse odorant receptor with an unusually broad response profile. *J.*  
470 *Neurosci.* **29**, 14545–52 (2009).

- 471 20. M. Shirasu, K. Yoshikawa, Y. Takai, A. Nakashima, H. Takeuchi, H. Sakano, K.  
472 Touhara, Olfactory receptor and neural pathway responsible for highly selective sensing  
473 of musk odors. *Neuron*. **81**, 165–178 (2014).
- 474 21. H. Saito, H. Nishizumi, S. Suzuki, H. Matsumoto, N. Ieki, T. Abe, H. Kiyonari, M. Morita,  
475 H. Yokota, N. Hirayama, T. Yamazaki, T. Kikusui, K. Mori, H. Sakano, Immobility  
476 responses are induced by photoactivation of single glomerular species responsive to  
477 fox odour TMT. *Nat. Commun.* **8**, 1–10 (2017).
- 478 22. A. Mizrahi, H. Matsunami, L. C. Katz, An imaging-based approach to identify ligands for  
479 olfactory receptors. *Neuropharmacology*. **47**, 661–668 (2004).
- 480 23. K. Miyamichi, S. Serizawa, H. Kimura, H. Sakano, Continuous and Overlapping  
481 Expression Domains of Odorant Receptor Genes in the Olfactory Epithelium Determine  
482 the Dorsal/Ventral Positioning of Glomeruli in the Olfactory Bulb. *J. Neurosci.* **25**, 3586–  
483 3592 (2005).
- 484 24. P. Feinstein, T. Bozza, I. Rodriguez, A. Vassalli, P. Mombaerts, Axon guidance of  
485 mouse olfactory sensory neurons by odorant receptors and the B2AR. *Cell*. **117**, 833–  
486 846 (2004).
- 487 25. J. Li, T. Ishii, P. Feinstein, P. Mombaerts, Odorant receptor gene choice is reset by  
488 nuclear transfer from mouse olfactory sensory neurons. *Nature*. **428**, 393–399 (2004).
- 489 26. A. Tsuboi, T. Miyazaki, T. Imai, H. Sakano, Olfactory sensory neurons expressing class  
490 I odorant receptors converge their axons on an antero-dorsal domain of the olfactory  
491 bulb in the mouse. *Eur. J. Neurosci.* **23**, 1436–1444 (2006).
- 492 27. A. Tsuboi, S. Yoshihara, N. Yamazaki, H. Kasai, H. Asai-Tsuboi, M. Komatsu, S.  
493 Serizawa, T. Ishii, Y. Matsuda, F. Nagawa, H. Sakano, Olfactory neurons expressing  
494 closely linked and homologous odorant receptor genes tend to project their axons to  
495 neighboring glomeruli on the olfactory bulb. *J. Neurosci.* **19**, 8409–8418 (1999).

- 496 28. S. Serizawa, T. Ishii, H. Nakatani, A. Tsuboi, F. Nagawa, M. Asano, K. Sudo, J.  
497 Sakagami, H. Sakano, T. Ijiri, Y. Matsuda, M. Suzuki, T. Yamamori, Y. Iwakura, H.  
498 Sakano, Mutually exclusive expression of odorant receptor transgenes. *Nat. Neurosci.*  
499 **3**, 687–693 (2000).
- 500 29. T. Bozza, A. Vassalli, S. Fuss, J. J. Zhang, B. Weiland, R. Pacifico, P. Feinstein, P.  
501 Mombaerts, Mapping of Class I and Class II Odorant Receptors to Glomerular Domains  
502 by Two Distinct Types of Olfactory Sensory Neurons in the Mouse. *Neuron*. **61**, 220–  
503 233 (2009).
- 504 30. A. Mortazavi, B. A. Williams, K. McCue, L. Schaeffer, B. Wold, Mapping and quantifying  
505 mammalian transcriptomes by RNA-Seq. *Nat. Methods*. **5**, 621–628 (2008).
- 506 31. D.-J. Zou, P. Feinstein, A. Rivers, G. Mathews, A. Kim, C. Greer, P. Mombaerts, S.  
507 Firestein, Postnatal Refinement of Peripheral Olfactory Projections. *Science*. **304**,  
508 1976–1979 (2004).
- 509 32. T. R. Mercer, M. B. Clark, J. Crawford, M. E. Brunck, D. J. Gerhardt, R. J. Taft, L. K.  
510 Nielsen, M. E. Dinger, J. S. Mattick, Targeted sequencing for gene discovery and  
511 quantification using RNA CaptureSeq. *Nat. Protoc.* **9**, 989–1009 (2014).
- 512 33. K. J. Ressler, S. L. Sullivan, L. B. Buck, A zonal organization of odorant receptor gene  
513 expression in the olfactory epithelium. *Cell*. **73**, 597–609 (1993).
- 514 34. R. Vassar, J. Ngai, R. Axel, Spatial segregation of odorant receptor expression in the  
515 mammalian olfactory epithelium. *Cell*. **74**, 309–318 (1993).
- 516 35. L. Astic, D. Saucier, Anatomical mapping of the neuroepithelial projection to the  
517 olfactory bulb in the rat. *Brain Res. Bull.* **16**, 445–454 (1986).
- 518 36. L. Tan, X. S. Xie, A near-complete spatial map of olfactory receptors in the mouse main  
519 olfactory epithelium. *Chem. Senses*. **43**, 427–432 (2018).
- 520 37. B. Zapiec, P. Mombaerts, The Zonal Organization of Odorant Receptor Gene Choice in

- 521 the Main Olfactory Epithelium of the Mouse. *Cell Rep.* **30**, 4220–4234 (2020).
- 522 38. E. Becht, L. McInnes, J. Healy, C. A. Dutertre, I. W. H. Kwok, L. G. Ng, F. Ginhoux, E.  
523 W. Newell, Dimensionality reduction for visualizing single-cell data using UMAP. *Nat.*  
524 *Biotechnol.* **37**, 38–47 (2019).
- 525 39. M. L. Schaefer, T. E. Finger, D. Restrepo, Variability of position of the P2 glomerulus  
526 within a map of the mouse olfactory bulb. *J. Comp. Neurol.* **436**, 351–362 (2001).
- 527 40. C. D. Mayer, J. Lorent, G. W. Horgan, Exploratory analysis of multiple omics datasets  
528 using the adjusted RV coefficient. *Stat. Appl. Genet. Mol. Biol.* **10** (2011).
- 529 41. K. Mori, H. Sakano, How is the olfactory map formed and interpreted in the mammalian  
530 brain? *Annu. Rev. Neurosci.* **34**, 467–499 (2011).
- 531 42. V. N. Murthy, Olfactory maps in the brain. *Annu. Rev. Neurosci.* **34**, 233–258 (2011).
- 532 43. B. Zapiec, O. Christian Bressel, M. Khan, A. Walz, P. Mombaerts, Neuropilin-1 and the  
533 Positions of Glomeruli in the Mouse Olfactory Bulb. *eNeuro.* **3**, 1–19 (2016).
- 534 44. E. Soucy, D. Albeanu, F. Antoniu, V. Murthy, M. Meister, Precision and diversity in an  
535 odor map on the olfactory bulb. *Nat. Neurosci.* **12**, 1351–1360 (2009).
- 536 45. R. Pacifico, A. Dewan, D. Cawley, C. Guo, T. Bozza, An olfactory subsystem that  
537 mediates high-sensitivity detection of volatile amines. *Cell Rep.* **2**, 76–88 (2012).
- 538 46. A. Nakashima, H. Takeuchi, T. Imai, H. Saito, H. Kiyonari, T. Abe, M. Chen, L. S.  
539 Weinstein, C. R. Yu, D. R. Storm, H. Nishizumi, H. Sakano, Agonist-independent GPCR  
540 activity regulates anterior-posterior targeting of olfactory sensory neurons. *Cell.* **154**,  
541 1314–1325 (2013).
- 542 47. F. Wang, A. Nemes, M. Mendelsohn, R. Axel, Odorant Receptors Govern the  
543 Formation of a Precise Topographic Map. *Cell.* **93**, 47–60 (1998).
- 544 48. G. Glusman, A. Bahar, D. Sharon, Y. Pilpel, J. White, D. Lancet, The olfactory receptor  
545 gene superfamily: Data mining, classification, and nomenclature. *Mamm. Genome.* **11**,

- 546 1016–1023 (2000).
- 547 49. T. Olender, T. E. M. Jones, E. Bruford, D. Lancet, A unified nomenclature for vertebrate  
548 olfactory receptors. *BMC Evol. Biol.* **20**, 1–12 (2020).
- 549 50. R. Grantham, Amino Acid Difference Formula to Help Explain Protein Evolution.  
550 *Science.* **185**, 862–864 (1974).
- 551 51. S. G. F. Rasmussen, B. T. Devree, Y. Zou, A. C. Kruse, K. Y. Chung, T. S. Kobilka, F.  
552 S. Thian, P. S. Chae, E. Pardon, D. Calinski, J. M. Mathiesen, S. T. A. Shah, J. A.  
553 Lyons, M. Caffrey, S. H. Gellman, J. Steyaert, G. Skiniotis, W. I. Weis, R. K. Sunahara,  
554 B. K. Kobilka, Crystal structure of the  $\beta$  2 adrenergic receptor-Gs protein complex.  
555 *Nature.* **477**, 549–557 (2011).
- 556 52. A. Kato, S. Katada, K. Touhara, Amino acids involved in conformational dynamics and  
557 G protein coupling of an odorant receptor: Targeting gain-of-function mutation. *J.*  
558 *Neurochem.* **107**, 1261–1270 (2008).
- 559 53. A. Kato, K. Touhara, Mammalian olfactory receptors: Pharmacology, G protein coupling  
560 and desensitization. *Cell. Mol. Life Sci.* **66**, 3743–3753 (2009).
- 561 54. C. A. De March, S. K. Kim, S. Antonczak, W. A. Goddard, J. Golebiowski, G protein-  
562 coupled odorant receptors: From sequence to structure. *Protein Sci.* **24**, 1543–1548  
563 (2015).
- 564 55. T. Imai, M. Suzuki, H. Sakano, Odorant Receptor-Derived cAMP Signals Direct Axonal  
565 Targeting. *Science.* **313**, 667–669 (2006).
- 566 56. T. Imai, T. Yamazaki, R. Kobayakawa, K. Kobayakawa, T. Abe, M. Suzuku, H. Sakano,  
567 Pre-Target Axon Sorting Establishes the Neural Map Topography. *Science.* **17**, 585–  
568 590 (2009).
- 569 57. A. Assens, J. A. Dal Col, A. Njoku, Q. Dietschi, C. Kan, P. Feinstein, A. Carleton, I.  
570 Rodriguez, Alteration of Nrp1 signaling at different stages of olfactory neuron

- 571 maturation promotes glomerular shifts along distinct axes in the olfactory bulb.
- 572 *Development*. **143**, 3817–3825 (2016).
- 573 58. G. A. Johnson, A. Badea, J. Brandenburg, G. Cofer, B. Fubara, S. Liu, J. Nissanov,  
574 Waxholm Space: An image-based reference for coordinating mouse brain research.  
575 *Neuroimage*. **53**, 365–372 (2010).
- 576 59. J. J. Egozcue, V. Pawlowsky-Glahn, G. Mateu-Figueras, C. Barceló-Vidal, Isometric  
577 Logratio Transformations for Compositional Data Analysis. *Math. Geol.* **35**, 279–300  
578 (2003).
- 579 60. J. D. Silverman, A. D. Washburne, S. Mukherjee, L. A. David, A phylogenetic transform  
580 enhances analysis of compositional microbiota data. *Elife*. **6**, 1–20 (2017).
- 581 61. M. Ma, G. M. Shepherd, Functional mosaic organization of mouse olfactory receptor  
582 neurons. *Proc. Natl. Acad. Sci. U. S. A.* **97**, 12869–12874 (2000).
- 583 62. Y. Jiang, N. N. Gong, X. S. Hu, M. J. Ni, R. Pasi, H. Matsunami, Molecular profiling of  
584 activated olfactory neurons identifies odorant receptors responding to odors in vivo.  
585 *Nat. Neurosci.* **18**, 1446–54 (2015).
- 586 63. R. M. Quadros, H. Miura, D. W. Harms, H. Akatsuka, T. Sato, T. Aida, R. Redder, G. P.  
587 Richardson, Y. Inagaki, D. Sakai, S. M. Buckley, P. Seshacharyulu, S. K. Batra, M. A.  
588 Behlke, S. A. Zeiner, A. M. Jacobi, Y. Izu, W. B. Thoreson, L. D. Urness, S. L. Mansour,  
589 M. Ohtsuka, C. B. Gurumurthy, Easi-CRISPR: A robust method for one-step generation  
590 of mice carrying conditional and insertion alleles using long ssDNA donors and CRISPR  
591 ribonucleoproteins. *Genome Biol.* **18**, 1–15 (2017).
- 592 64. C. R. Yu, J. Power, G. Barnea, S. O'Donnell, H. E. V. Brown, J. Osborne, R. Axel, J. A.  
593 Gogos, Spontaneous neural activity is required for the establishment and maintenance  
594 of the olfactory sensory map. *Neuron*. **42**, 553–566 (2004).
- 595 65. J. B. Wechselblatt, E. D. Flister, D. M. Piscopo, C. M. Niell, Large-scale imaging of



- 596 cortical dynamics during sensory perception and behavior. *J. Neurophysiol.* **115**, 2852–  
597 2866 (2016).
- 598 66. H. Saito, M. Kubota, R. W. Roberts, Q. Chi, H. Matsunami, RTP family members induce  
599 functional expression of mammalian odorant receptors. *Cell.* **119**, 679–691 (2004).
- 600 67. H. Zhuang, H. Matsunami, Evaluating cell-surface expression and measuring activation  
601 of mammalian odorant receptors in heterologous cells. *Nat. Protoc.* **3**, 1402–1413  
602 (2008).
- 603 68. L. B. Vosshall, R. F. Stocker, Molecular architecture of smell and taste in *Drosophila*.  
604 *Annu. Rev. Neurosci.* **30**, 505–533 (2007).
- 605 69. V. Grabe, A. Strutz, A. Baschwitz, B. S. Hansson, S. Sachse, Digital in vivo 3D atlas of  
606 the antennal lobe of *Drosophila melanogaster*. *J. Comp. Neurol.* **523**, 530–544 (2015).
- 607 70. P. P. Laissue, C. Reiter, P. R. Hiesinger, S. Halter, K. F. Fischbach, R. F. Stocker,  
608 Three-Dimensional Reconstruction of the Antennal Lobe in. *J. Comp. Neurol.* **552**, 543–  
609 552 (1999).
- 610 71. E. A. Hallem, J. R. Carlson, Coding of Odors by a Receptor Repertoire. *Cell.* **125**, 143–  
611 160 (2006).
- 612 72. Y. H. Chou, M. L. Spletter, E. Yaksi, J. C. S. Leong, R. I. Wilson, L. Luo, Diversity and  
613 wiring variability of olfactory local interneurons in the *Drosophila* antennal lobe. *Nat.*  
614 *Neurosci.* **13**, 439–449 (2010).
- 615 73. S. R. Olsen, V. Bhandawat, R. I. Wilson, Divisive normalization in olfactory population  
616 codes. *Neuron.* **66**, 287–299 (2010).
- 617 74. J. M. Jeanne, M. Fişek, R. I. Wilson, The Organization of Projections from Olfactory  
618 Glomeruli onto Higher-Order Neurons. *Neuron.* **98**, 1198-1213.e6 (2018).
- 619 75. N. K. Tanaka, K. Endo, K. Ito, Organization of antennal lobe-associated neurons in  
620 adult *Drosophila melanogaster* brain. *J. Comp. Neurol.* **520**, 4067–4130 (2012).

- 621 76. J. P. Royet, C. Souchier, F. Jourdan, H. Ploye, Morphometric study of the glomerular  
622 population in the mouse olfactory bulb: numerical density and size distribution along the  
623 rostrocaudal axis. *J. Comp. Neurol.* **270**, 559–68 (1988).
- 624 77. J. Zhang, R. Pacifico, D. Cawley, P. Feinstein, T. Bozza, Ultrasensitive detection of  
625 amines by a trace amine-associated receptor. *J. Neurosci.* **33**, 3228–3239 (2013).
- 626 78. J. Köster, S. Rahmann, Snakemake—a scalable bioinformatics workflow engine.  
627 *Bioinformatics.* **28**, 2520–2522 (2012).
- 628 79. A. Dobin, C. A. Davis, F. Schlesinger, J. Drenkow, C. Zaleski, S. Jha, P. Batut, M.  
629 Chaisson, T. R. Gingeras, STAR: Ultrafast universal RNA-seq aligner. *Bioinformatics.*  
630 **29**, 15–21 (2013).
- 631 80. B. Li, C. N. Dewey, RSEM: accurate transcript quantification from RNA-Seq data with or  
632 without a reference genome. *BMC Bioinformatics.* **12**, 323 (2011).
- 633 81. T. Olender, N. Nativ, D. Lancet, "HORDE: Comprehensive Resource for Olfactory  
634 Receptor Genomics" in *Olfactory Receptors: Methods and Protocols*, C. J. Crasto, Ed.  
635 (Humana Press, Totowa, NJ, 2013), pp. 23–38.
- 636 82. D. J. McCarthy, Y. Chen, G. K. Smyth, Differential expression analysis of multifactor  
637 RNA-Seq experiments with respect to biological variation. *Nucleic Acids Res.* **40**, 4288–  
638 4297 (2012).
- 639 83. C. A. de March, J. Topin, E. Bruguera, G. Novikov, K. Ikegami, H. Matsunami, J.  
640 Golebiowski, Odorant Receptor 7D4 Activation Dynamics. *Angew. Chemie - Int. Ed.* **57**,  
641 4554–4558 (2018).
- 642 84. H. Zhuang, H. Matsunami, Synergism of accessory factors in functional expression of  
643 mammalian odorant receptors. *J. Biol. Chem.* **282**, 15284–15293 (2007).
- 644 85. H. Saito, Q. Chi, H. Zhuang, H. Matsunami, J. D. Mainland, Odor coding by a  
645 Mammalian receptor repertoire. *Sci. Signal.* **2**, ra9–ra9 (2009).



647 **ACKNOWLEDGMENTS:**

648 We thank members of the Matsunami lab for thoughtful discussions and feedback. Luis R.  
649 Saraiva (SIDRA Institute), Antonio Scialdone (Helmholtz Zentrum München), and Mayra L.  
650 Ruiz Tejada Segura (Helmholtz Zentrum München) provided helpful advice on mapping OR  
651 expression and spatial transcriptomics. We thank Sayan Mukherjee (Duke University) for  
652 guidance on the combination of single dimension transcriptomic data into a three dimensional  
653 model. We thank C. Ron Yu (Stowers Institute, Univ. of Kansas) for providing OMP-IRES-tTA  
654 mice. We thank Shelby Priest (Duke University) for assistance with critical reading and  
655 feedback.

656

657 **FUNDING**

658 National Science Foundation grant 1555919 (MW, HM)  
659 National Institute of Neurological Disorders and Stroke grant R01NS109979 (MW)  
660 National Institutes of Health grant 1F31DC017394-03A1 (KWZ)  
661 National Institute of Mental Health grant F32MH115448 (SDB)  
662 National Institutes of Health grant K99DC018333-01 (CAdM)

663

664 **AUTHOR CONTRIBUTIONS**

665 Conceptualization: KWZ, MW, HM  
666 Methodology: KWZ, SDB, JDS, MW, HM  
667 Investigation: KWZ, SDB, MHN, MW, HM  
668 Visualization: KWZ, SDB, MHN, CAdM, MW, HM  
669 Funding acquisition: KWZ, SDB, MW, HM  
670 Project administration: MW, HM  
671 Supervision: MW, HM

672 Writing – original draft: KWZ, SDB, MW, HM

673 Writing – review & editing: KWZ, SDB, MHN, JDS, CAdM, MW, HM

674

675 **COMPETING INTERESTS**

676 Authors declare that they have no competing interests.

677

678 **DATA AND MATERIALS AVAILABILITY**

679 All data are available in the main text or the supplemental materials.

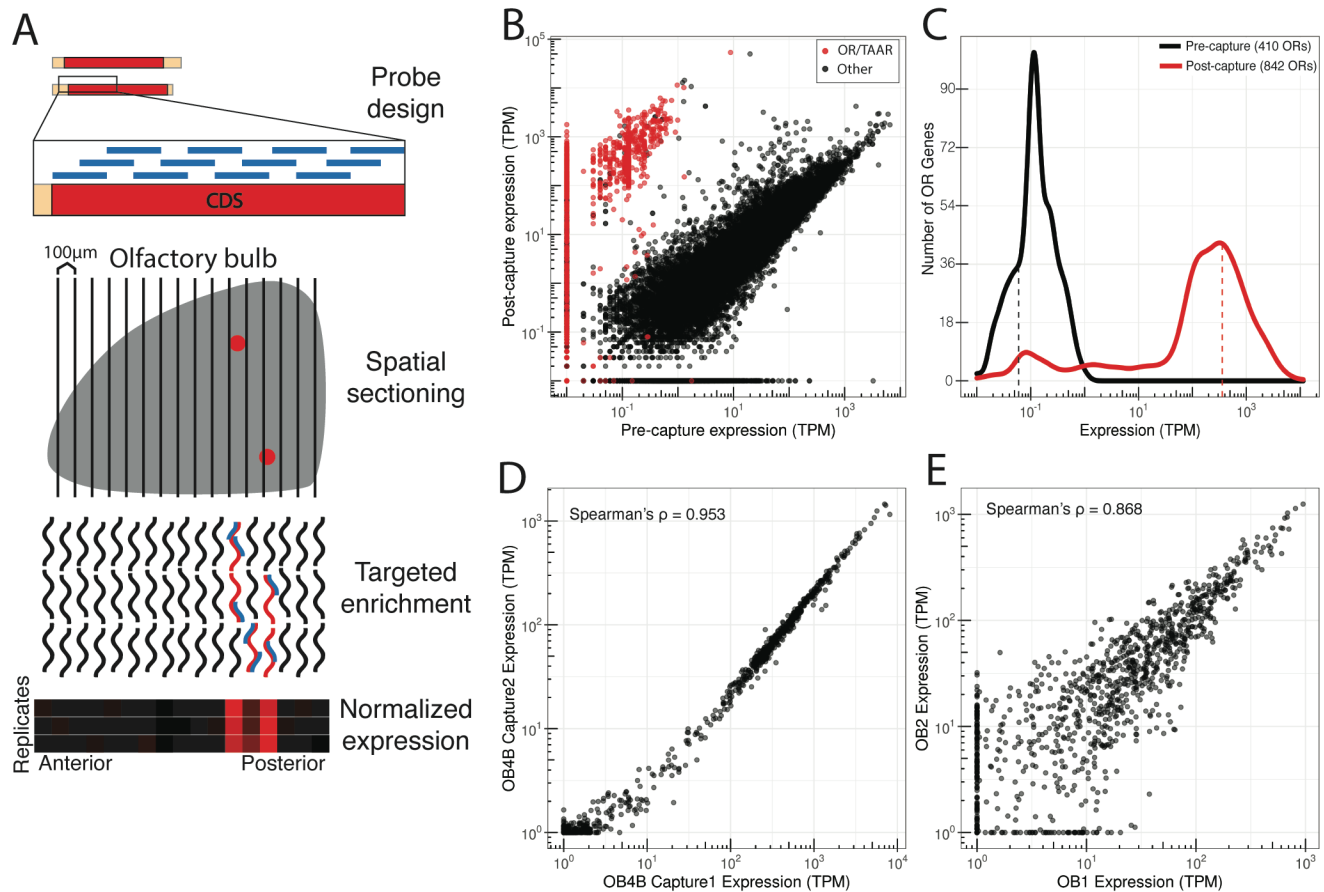

680

681 **Fig. 1. Target capture sequencing consistently enriches OR transcripts. (A)**

682 Methodological overview for targeted enrichment of OR and TAAR transcripts from OB

683 sections. Briefly, RNA is extracted from OB tissue and used for cDNA synthesis and library

684 preparation. Capture probes are designed against coding sequences (CDS) of interest,

685 enabling enrichment of target genes following binding and washing steps. RNA-Seq of

686 enriched libraries allows for high-throughput positional analyses when combined with

687 systematic tissue sectioning. (B) Pre- and post-capture normalized abundances (transcripts

688 per million; TPM) of intact OR and TAAR genes (red) and other intact genes (black) from a

689 whole OB. (C) Frequency distribution of OR gene abundances pre- and post-capture from a

690 whole OB. (D) Technical replicates demonstrating OR and TAAR gene abundances from

691 independent capture enrichments of the same whole-OB RNA. (E) Biological replicates

692 demonstrating OR and TAAR gene abundances from capture enrichment of whole-OB RNA  
693 samples from different animals.

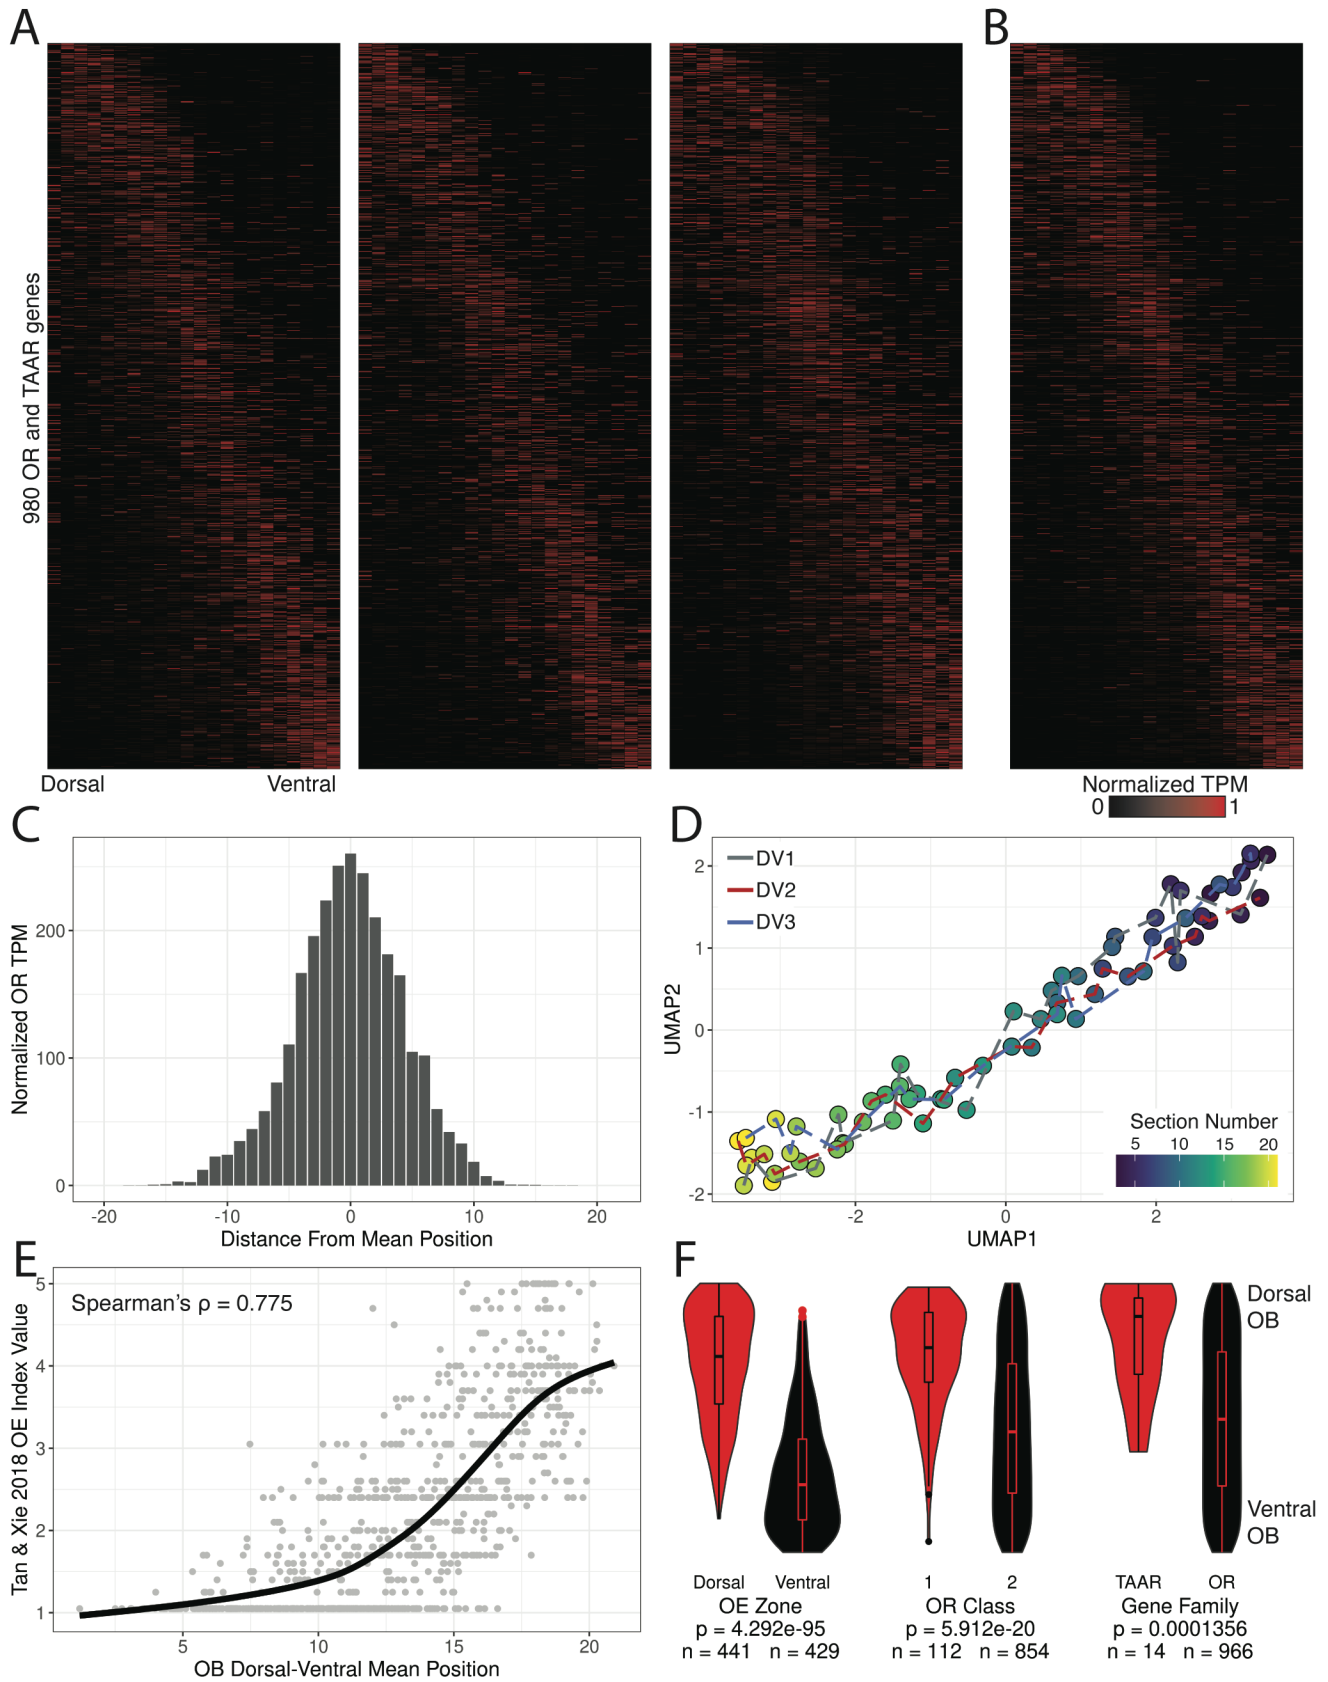

694

695 **Fig. 2. Glomerular OR expression correlates with OE expression along the DV axis. (A)**



696 Heatmaps for 980 ORs and TAARs across 22 DV sections sorted by mean position of  
697 expression from three replicate mice. **(B)** Merged representation of DV replicates. Ordering of  
698 genes (Y axis) is consistent across all heatmaps. **(C)** Distribution of normalized TPM  
699 (maximum observed value = 1, minimum observed value = 0) for all 980 ORs and TAARs  
700 from position of mean expression. **(D)** UMAP projection of 22 DV sections from all three  
701 replicates. **(E)** Line is loess smoothed regression of OE DV index from Tan and Xie, *Chem.*  
702 *Senses* 2018 across DV mean positions from our targeted spatial data. **(F)** Distribution of  
703 ranked DV mean positions for the 980 ORs and TAARs by OE zone, OR class, and gene  
704 family. Statistic is Mann-Whitney U-test.

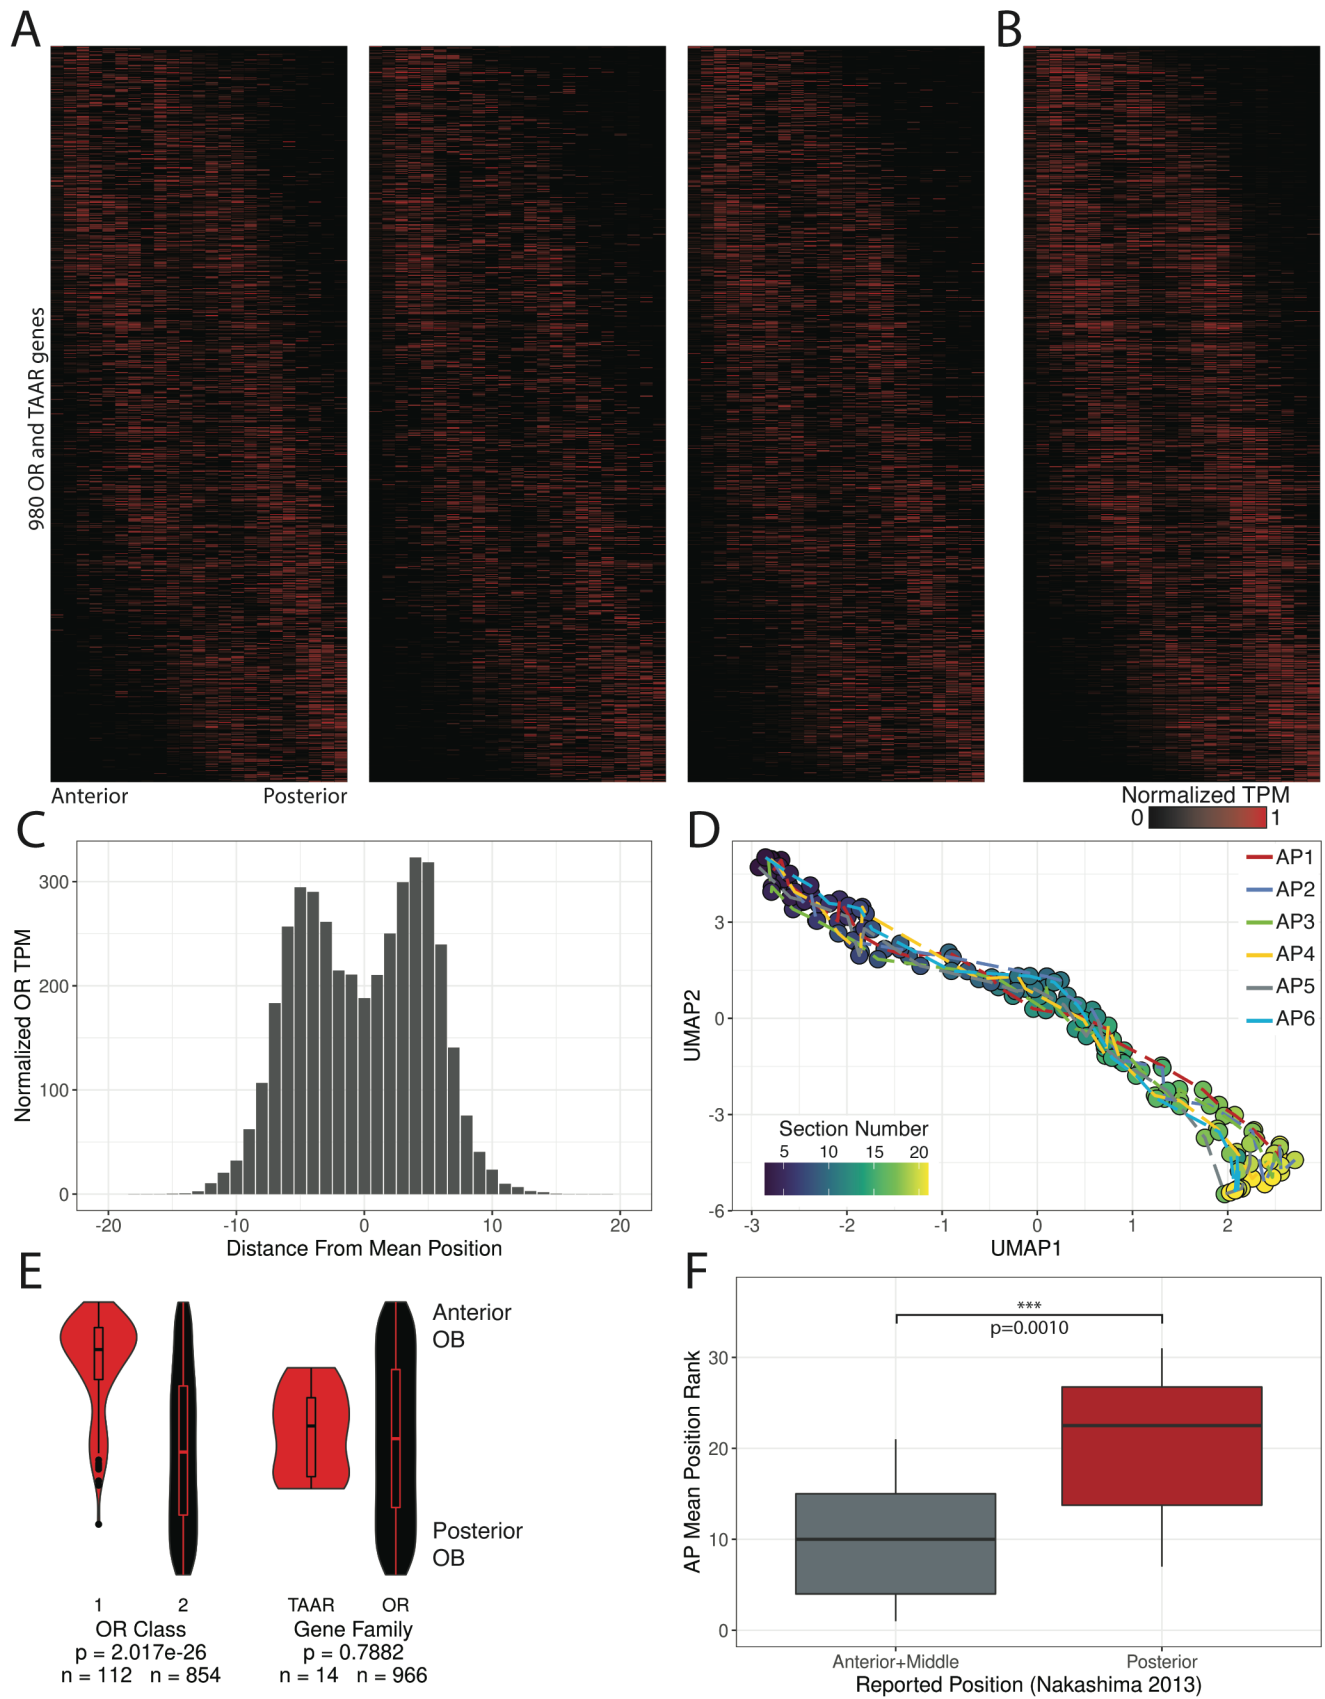

705

706

**Fig. 3. Glomerular OR expression is bimodally distributed along the anteroposterior**

707 **axis. (A)** Heatmaps for 980 ORs and TAARs across 23 AP sections sorted by mean position  
708 of expression from three replicate mice. **(B)** Merged representation from A. Ordering of genes  
709 is consistent across all heatmaps. **(C)** Distribution of normalized TPM (maximum observed  
710 value = 1, minimum observed value = 0) for all 980 ORs and TAARs from position of mean  
711 expression. **(D)** UMAP projection of 23 AP sections across all six replicates. **(E)** Distribution of  
712 ranked AP mean positions for the 980 ORs and TAARs by OR class and gene family. Statistic  
713 is Mann-Whitney U-test. **(F)** Distribution of the ranked AP mean position for the set of ORs  
714 cloned from the anterior and middle OB positions vs the posterior OB position from  
715 Nakashima et al. *Cell*. 2013. Statistic is Mann-Whitney U-test.

716

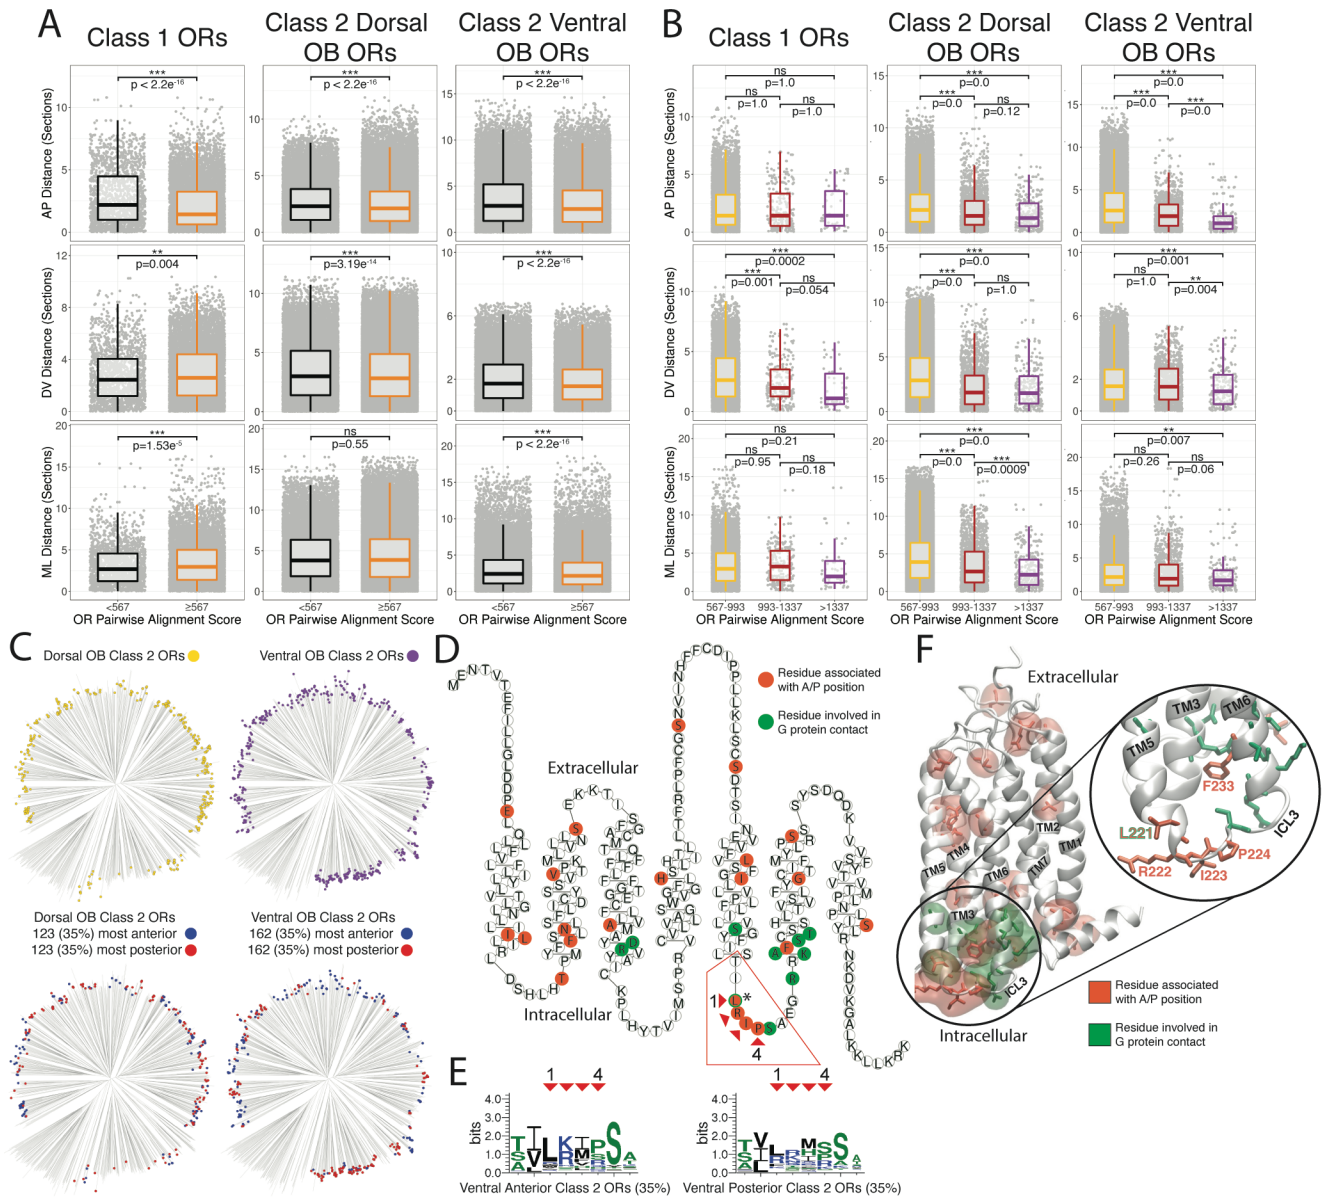

717

718

719

720

721

722

723

724

725

**Fig. 4. OR sequence similarity correlates with glomerular position more strongly**

**among ventral than dorsal Class II ORs. (A)** Pairwise comparisons between mean position

distance and OR protein alignment score for all ORs separated by an alignment score cutoff

relating to OR percent identity for family level classification with ORs below the family level

score cutoff (<567) in black and above the family level score cutoff (≥567) in orange for the

AP (top), DV (middle), and ML dimensions (bottom). Statistic is Mann-Whitney U-test. For

Class I, n in “<567” = 1778, n in “≥567” = 8934. For Class II dorsal ORs, n in “<567” = 19346,

n in “≥567” = 87256. For Class II ventral ORs, n in “<567” = 26718, n in “≥567” = 37544. **(B)**

726 Pairwise comparisons between mean position distance and OR protein alignment score for  
727 ORs above family level classification (40%, 567) separated by an alignment score cutoffs  
728 relating to OR percent identity for subfamily level classification (60%, 993) and highly similar  
729 ORs (80%, 1337) for the AP (top), DV (middle), and ML dimensions (bottom). ORs falling  
730 within the range of family to subfamily level ORs (567-993) are displayed in yellow, subfamily  
731 to highly similar level ORs (993-1337) are displayed in red, and above the highly similar level  
732 OR score cutoff (>1337) in magenta. Statistic is Mann-Whitney U-test. For Class I, n in “567-  
733 993” = 8632, n in “993-1337” = 248, n in “>1337” = 54. For Class II dorsal ORs, n in “567-993”  
734 = 85144, n in “993-1337” = 1830, n in “>1337” = 282. For Class II ventral ORs, n in “567-993”  
735 = 36204, n in “993-1337” = 1126, n in “>1337” = 214. **(C)** Phylogenetic tree of all Class II  
736 dorsal OB ORs (top left, n = 354), all Class II ventral OB ORs (top right, n = 464), the most  
737 anterior (35%, blue) and most posterior (35%, red) Class II ORs from the dorsal (bottom left)  
738 and ventral OB (bottom right) DV zones. **(D)** Snakeplot of the Class II OR consensus protein  
739 sequence; orange residues have significantly different physicochemical properties for ventral,  
740 anterior or posterior, Class II ORs compared to all ventral Class II ORs. Green residues  
741 indicate residues known to be involved in Class A GPCR activation through contact with the G  
742 protein (\* indicates the single residue which was identified as being both associated with G  
743 protein contact and identified as significantly different for ventral, anterior, Class II ORs). **(E)**  
744 Protein sequence logos for the four identified intracellular loop 3 residues associated with  
745 ventral Class II anterior/posterior ORs depicting the conservation of specific amino acid  
746 residues at each position. Red arrows indicate the specific residue within the Class II OR  
747 consensus snakeplot (C) and the corresponding position in the sequence logo. **(F)** Homology  
748 model of the mouse Class II consensus OR. Transmembrane helices (TM) are numbered with  
749 residues associated with A/P positions (orange) and residues in contact with the G protein  
750 (green) depicted in licorice with transparent regions indicating the residue surface. Right,

751 highlight of intracellular loop 3 (ICL3) where residues associated with A/P positions are  
752 intermingled with the residues in contact with the G protein.

753

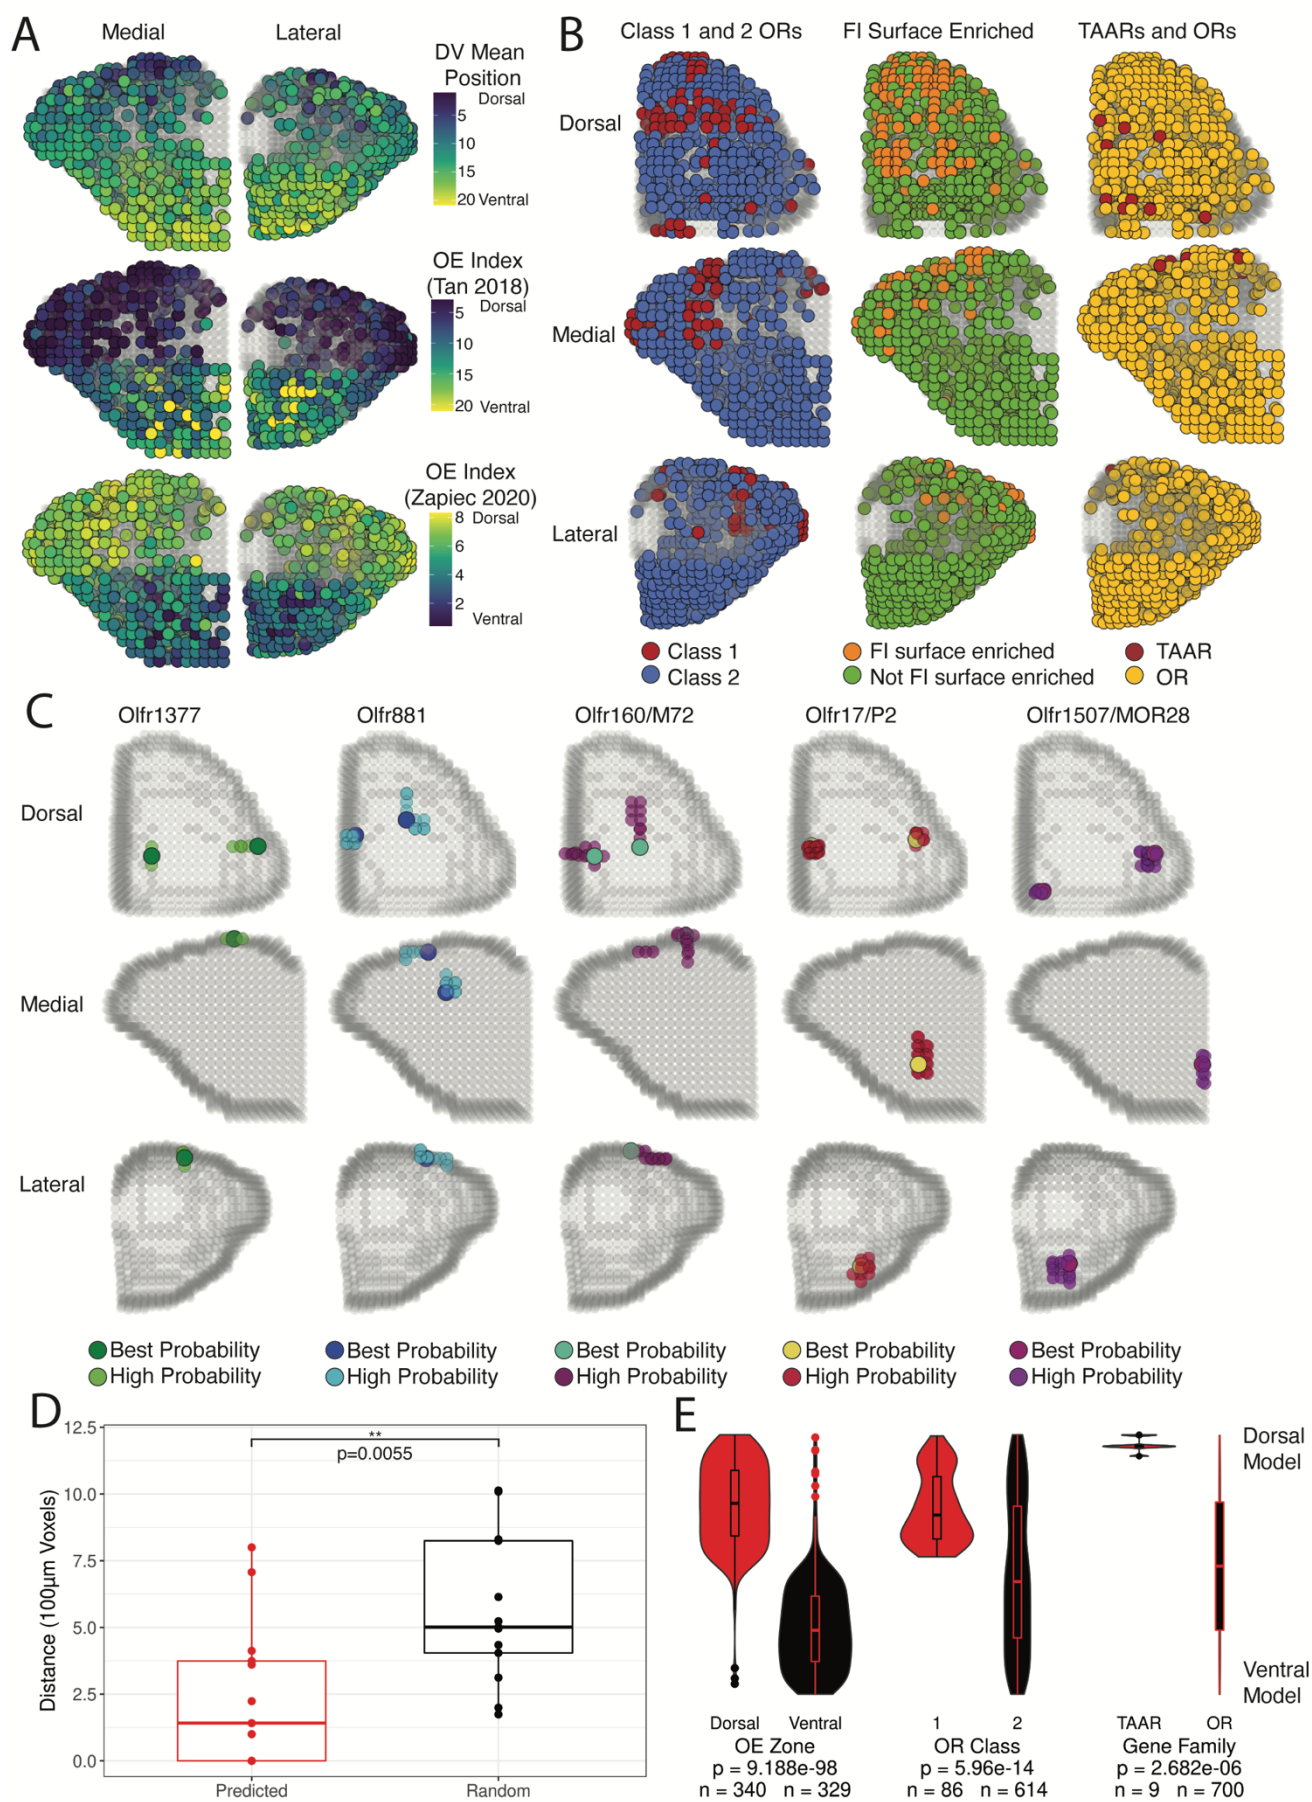

755 **Fig. 5. A three-dimensional model for OR glomerular positions from combined single-**  
756 **dimension targeted sequencing data. (A)** Three-dimensional predictions for the 709 ORs  
757 and TAARs with DV mean positions (top) and with observed values in OE DV indices (middle  
758 and bottom). **(B)** Three-dimensional predictions for the 709 ORs and TAARs with colors  
759 revealing contrasting distributions of Class I vs Class II ORs, functional imaging surface  
760 enriched vs not enriched ORs, and TAARs vs ORs. **(C)** Three-dimensional predictions for  
761 labeled ORs generated in this study and from Zapiec and Mombaerts *PNAS* 2015. High  
762 probability positions indicate the set of adjacent voxels containing highly ranked probabilities  
763 for that OR with the best probability color indicates the voxel with the highest ranked  
764 probability within that cluster of voxels. **(D)** Distance between predicted OR position and OR  
765 positions determined from gene-targeted mouse lines compared to 50 random ORs from the  
766 same DV zone (15 ORs used for unusual zone) and side of the OB. Statistic is Mann-Whitney  
767 U-test. **(E)** Distribution of ranked mean DV model position for the best probability voxel in  
768 each predicted glomerulus for all 709 ORs and TAARs for OE zone, OR Class, and gene  
769 family. Statistic is Mann-Whitney U-test.



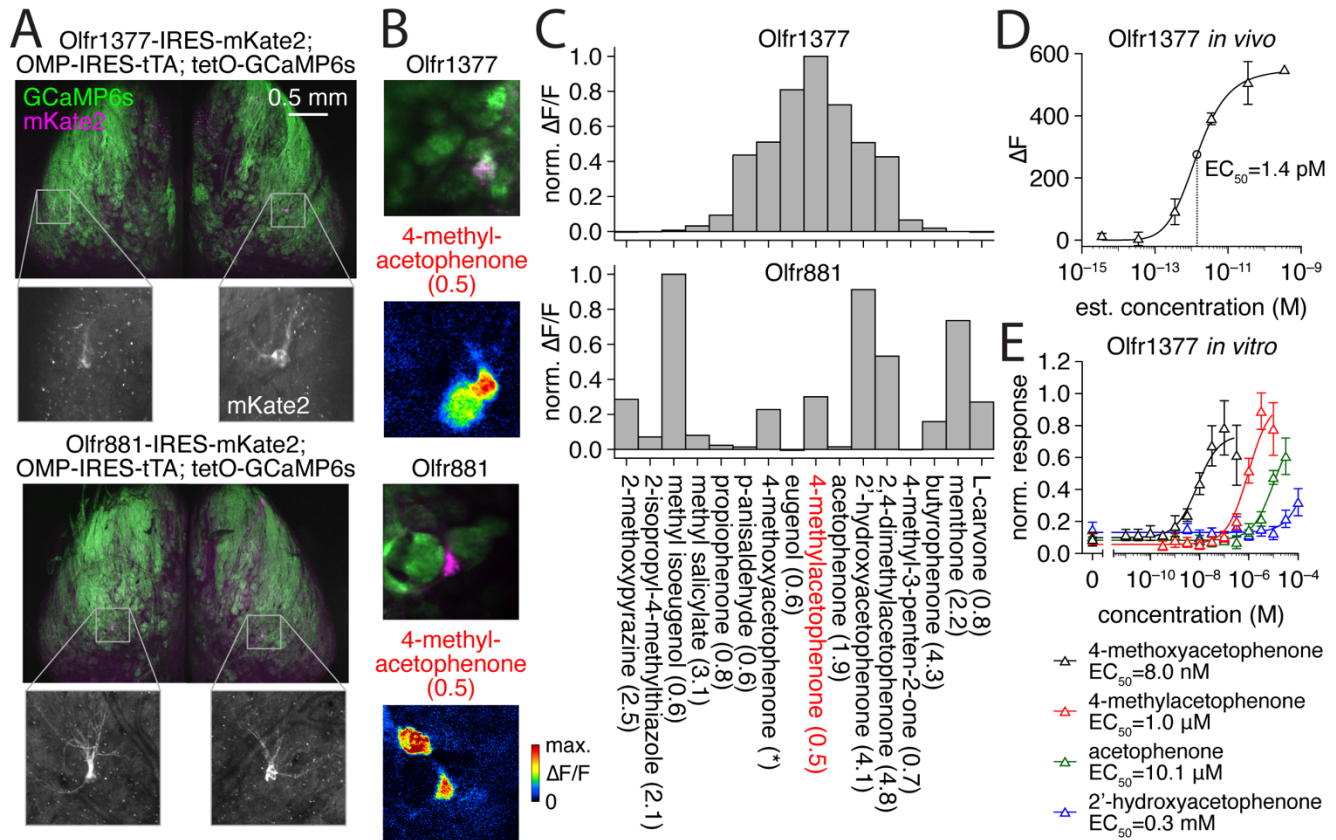

770

771 **Fig. 6. Deorphanization of Olfr1377 and Olfr881.** (A) Whole-mount confocal maximal  
772 intensity projection of compound heterozygous Olfr1377-IRES-mKate2; OMP-IRES-tTA; tetO-  
773 GCaMP6s and Olfr881-IRES-mKate2; OMP-IRES-tTA; tetO-GCaMP6s mice following two-  
774 photon functional imaging. (B) Baseline fluorescence and GCaMP6s ΔF/F responses to 2-s  
775 presentation of 4-methylacetophenone during two-photon functional imaging of the  
776 heterozygous lines in (A). Estimated concentration of delivered odorant (in nM) provided in  
777 parentheses here and elsewhere. Olfr1377 response map scaled from 0-80% ΔF/F. Olfr881  
778 response map scaled from 0-30% ΔF/F. (C) Spectra of Olfr1377 and Olfr881 glomerular ΔF/F  
779 responses (sorted by Olfr1377 response magnitude) to a subset of ligands detected within a  
780 larger odorant panel. Odorants presented at an estimated concentration on the order of 10<sup>0</sup>  
781 nM, with the exception of 4-methoxyacetophenone (~3.5 nM for Olfr881; ~3.5 × 10<sup>-3</sup> nM for  
782 Olfr1377). (D) In vivo concentration-response function of the Olfr1377 glomerulus to 4-

783 methoxyacetophenone. **(E)** In vitro concentration-response function of the Olfr1377 receptor  
784 to an array of cyclic ketone odorants.
